# Supplementary material
Source: Springer Nature journal article supplement (https://www.springermedizin.de/resource/supplementary/12981_2009_135_MOESM1_ESM.pdf/9603990)

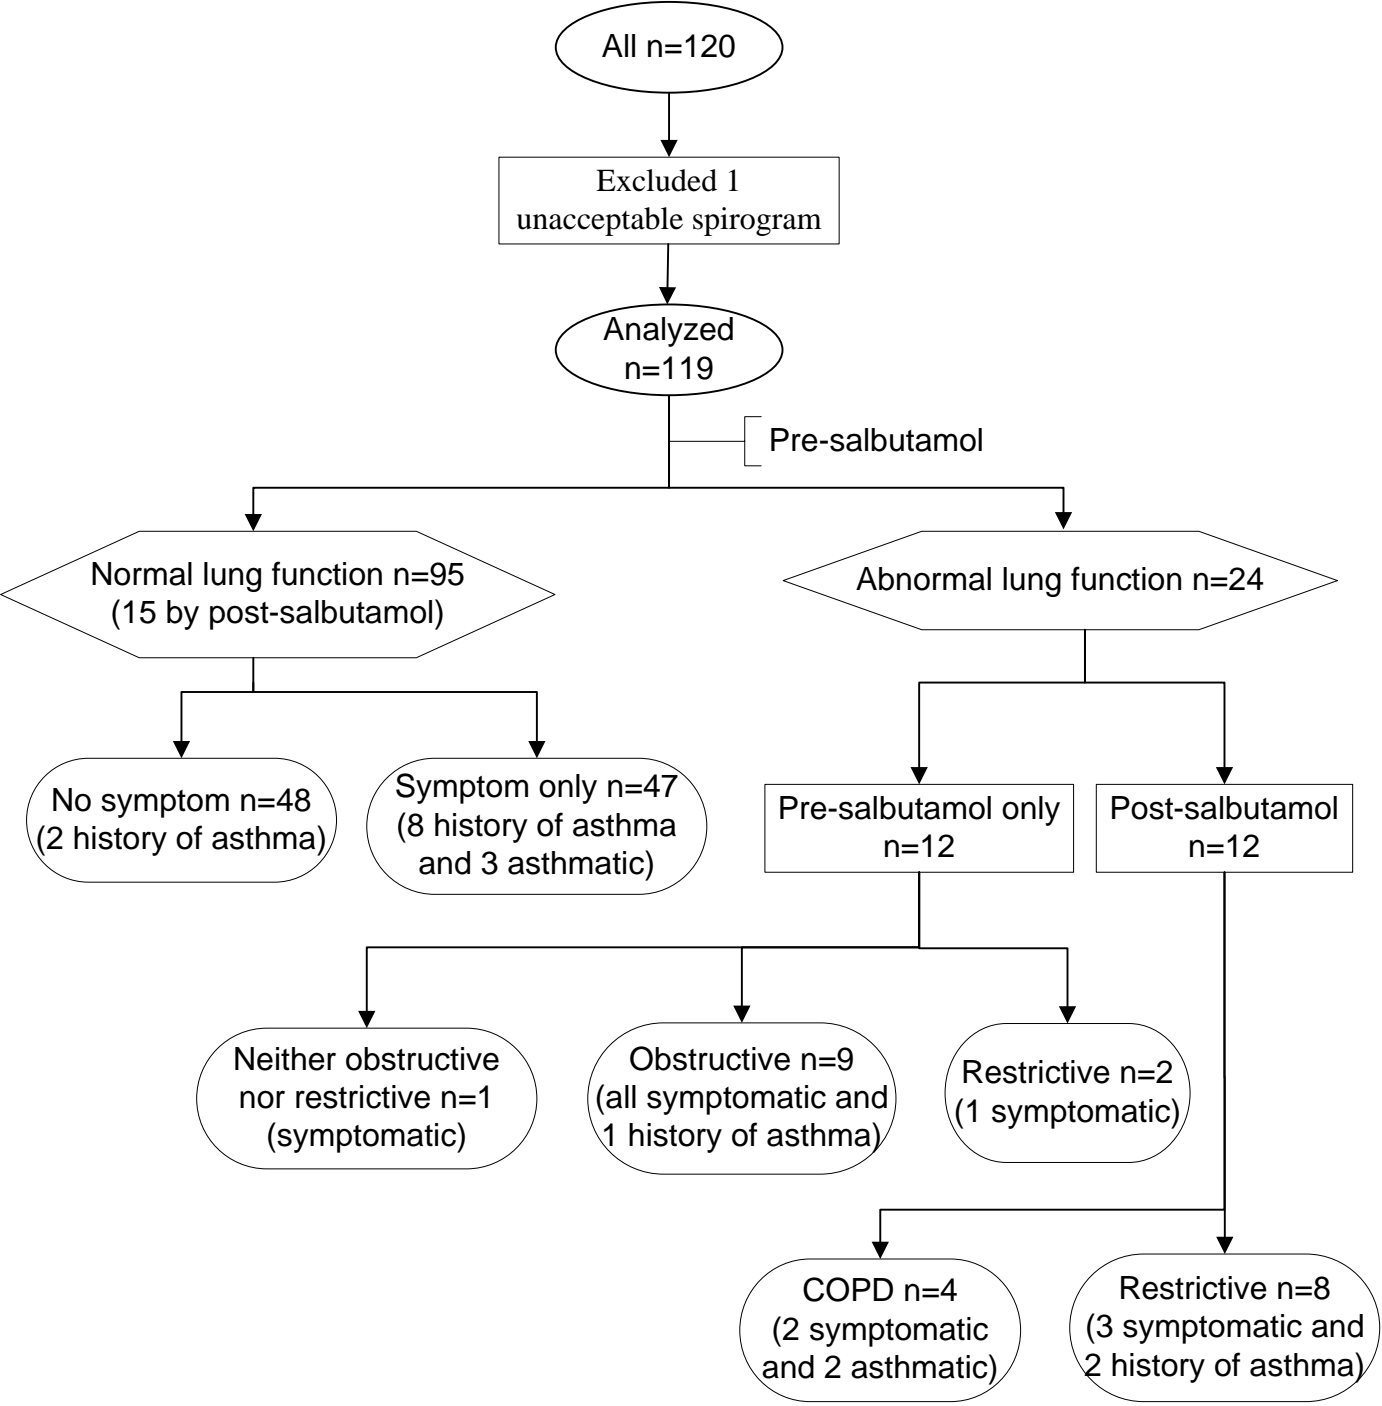

Supplement: MOESM1 [file 9603990]
